# Supplementary material
Source: PubMed Central journal article supplement (PMC8084935)
Supplement: NIHMS1673284-supplement-1.pdf [file NIHMS1673284-supplement-1.pdf]

*Supporting Information for:*

## **Functional Elucidation of TfuA in Peptide Backbone Thioamidation**

Andi Liu<sup>1,2</sup>, Yuanyuan Si<sup>2,3</sup>, Shi-Hui Dong<sup>4,5</sup>, Nilkamal Mahanta<sup>2,3,6</sup>, Haley N. Penkala<sup>1,2</sup>, Satish K. Nair<sup>2,3,4</sup>, and Douglas A. Mitchell<sup>1,2,3,\*</sup>

<sup>1</sup>Department of Microbiology, <sup>2</sup>Carl R. Woese Institute for Genomic Biology, <sup>3</sup>Department of Chemistry, <sup>4</sup>Department of Biochemistry, University of Illinois, Urbana, IL, 61801, USA; <sup>5</sup>current address: State Key Laboratory of Applied Organic Chemistry, College of Chemistry and Chemical Engineering, Lanzhou University, Lanzhou, 730000, P.R. China; <sup>6</sup>current address: Department of Chemistry, Indian Institute of Technology Dharwad, Karnataka, 580011, India

\*Author to whom correspondence should be addressed: [douglasm@illinois.edu](mailto:douglasm@illinois.edu)

**Supplementary Table 1. Oligonucleotide primers used in this study.** Nucleotide sequences are given in the 5' to 3' direction. f, forward primer; r, reverse primer; capital letters, mutagenized codon; capitalized and italicized, restriction enzyme recognition site. Mt, *Methanothermobacter* sp. CaT2; Azo, *Azospirillum* sp. B510.

| Primer name                | Oligonucleotide sequence                          |
|----------------------------|---------------------------------------------------|
| <i>Mt</i> ThiS_BamHI       | ataGGATCCatggtgataggatgaagtttac                   |
| <i>Mt</i> ThiS_HindIII     | aaaAAGCTttaaccgcccgtagataaacc                     |
| His- <i>Mt</i> TfuA_Sall_f | aaaGTCGACatgcatggtaagaaaataatcatc                 |
| His- <i>Mt</i> TfuA_NotI_r | ataGCGGCCGCtattctgtatatgcaagtctc                  |
| <i>Mt</i> TfuA_HindIII_f   | aaAAGCTTaatgcatggtaagaaaataatcatcttcacg           |
| <i>Mt</i> TfuA_NotI_r      | aaaGCGGCCGCtattctgtatatgcaagtctctttatatgacgg      |
| <i>Mt</i> YcaO_HindIII_f   | aaAAGCTTaatgttccgggatattcctgtcag                  |
| <i>Mt</i> YcaO_NotI_r      | aaaGCGGCCGCtcagatggaggacctgatgcg                  |
| <i>Mt</i> ThiF_HindIII_f   | aaAAGCTTaatgcctgagagatatgaggggatg                 |
| <i>Mt</i> ThiF_NotI_r      | aaaGCGGCCGCtcaggatagttcaacaattttaaatgggttcg       |
| AzoTfuA_BamHI_f            | aaaGGATCCaatgaagatctgtgttttccttggtcc              |
| AzoTfuA_NotI_r             | aaaGCGGCCGCtcacgcctgcatctcctcttc                  |
| AzoYcaO_NdeI_f             | ttaCATATGatgagcttcgacaaatc                        |
| AzoYcaO_KpnI_r             | attGGTACctcacgccacgcctgccc                        |
| <i>Mt</i> ThiS_E47Q/E51D_f | aaaagaacggcCAGatagtcataGATgaagaggagatcttcgatggcg  |
| <i>Mt</i> ThiS_E47Q/E51D_r | atctcctcttcATCtatgactatCTGgccgttctttttcacgacaaccg |
| <i>Mt</i> TfuA_R85A_f      | tgggggcccctgGCAgcctcagagctcagtgaccttg             |
| <i>Mt</i> TfuA_R85A_r      | agctctgagggcTGCcagggcccccatgctggcccc              |
| <i>Mt</i> TfuA_D51A_f      | taggcataataGCCgggtgtttccaccagagccctgctg           |
| <i>Mt</i> TfuA_D51A_r      | tggaaaacaccGGCtattatgctattatgcaagggttctccttc      |
| <i>Mt</i> TfuA_D112A_f     | aaatcgaatcgGCTgatgacgttgacgttgaccttaacc           |
| <i>Mt</i> TfuA_D112A_r     | gcaacgtcatcAGCcgattcgatttcaccctcaaggtatgatc       |
| <i>Mt</i> TfuA_K198M_f     | gcagggaccttATGagggaggacgcactggaggtcatc            |
| <i>Mt</i> TfuA_K198M_r     | gcgtcctccctCATaaggctccctgccctctgattcaagg          |
| <i>Mt</i> TfuA_D201N_f     | ttaaaggaggAACgcactggaggtcatccgtcatataaag          |
| <i>Mt</i> TfuA_D201N_r     | acctccagtgGTTctcccttttaaggctccctgccctc            |
| <i>Mt</i> TfuA_Y104A_f     | tcttcagatcaGCActtgagggtgaaatcgaatcggatgatg        |
| <i>Mt</i> TfuA_Y104A_r     | tcaccctcaagTGCTgatctgaagatgcccacaacc              |
| <i>Mt</i> TfuA_S80A_f      | ttggagggggccGCCatgggggcccctgagggcctcagagc         |
| <i>Mt</i> TfuA_S80A_r      | agggcccccatGGCggccccctccaaccaccttcacaccctc        |
| <i>Mt</i> TfuA_S80C_f      | ttggagggggccTGCatgggggcccctgagggcctcagag          |
| <i>Mt</i> TfuA_S80C_r      | agggcccccatGCAggccccctccaaccaccttcacaccctc        |
| <i>Mt</i> TfuA_S80T_f      | ttggagggggccACCatgggggcccctgagggcctcagag          |
| <i>Mt</i> TfuA_S80T_r      | agggcccccatGGTggccccctccaaccaccttcacaccctc        |
| <i>Mt</i> TfuA_E64A_f      | ggtcacagggcgatcattgatgccatcagg                    |

|                       |                                           |
|-----------------------|-------------------------------------------|
| <i>MtTfuA_E64A_r</i>  | atcaatgatcgccctgtgaccaacagcagg            |
| <i>MtTfuA_M81A_f</i>  | ggggccagcgcggggccctgagggcc                |
| <i>MtTfuA_M81A_r</i>  | cagggcccccgcgctggccctccaaccac             |
| <i>MtTfuA_L84A_f</i>  | atggggggcgcgagggcctcagagctcag             |
| <i>MtTfuA_L84A_r</i>  | tgaggccctcgcggcccccattgctggc              |
| <i>MtTfuA_V115A_f</i> | gatgatgacgcggcagttgcctttaaccctg           |
| <i>MtTfuA_V115A_r</i> | ggcaactgccgcgtcatcatccgattcgatttc         |
| <i>MtTfuA_R167A_f</i> | tacccccctcgcgaattacaggaggatcctc           |
| <i>MtTfuA_R167A_r</i> | cctgtaattcgcgaggggtagaagaggttc            |
| <i>MtTfuA_F54A_f</i>  | gacgggtgttGCGcaccagagccctgctgttggtcac     |
| <i>MtTfuA_F54A_r</i>  | ggctctggtgCGCaacaccgtctattatgcctattatg    |
| <i>MtTfuA_D201A_f</i> | cttaaaggagGCGcactggaggtcatccgtcatataaag   |
| <i>MtTfuA_D201A_r</i> | cctccagtgcCGCctcccttttaaggccctgcccctctg   |
| <i>MtTfuA_E88Q_f</i>  | agggcctcaCAGctcagtgaccttggaaatg           |
| <i>MtTfuA_E88Q_r</i>  | gtcactgagCTGTgaggccctcagggc               |
| <i>MtTfuA_E88D_f</i>  | agggcctcaGATctcagtgaccttggaaatg           |
| <i>MtTfuA_E88D_r</i>  | gtcactgagATCTgaggccctcagggc               |
| <i>MtTfuA_H62A_f</i>  | gctgttggtGCAaggagatcattgatgcc             |
| <i>MtTfuA_H62A_r</i>  | gatctccctTGCaccaacagcagggctc              |
| <i>MtTfuA_D198A_f</i> | gagggcaggGCActtaaaggaggac                 |
| <i>MtTfuA_D198A_r</i> | ccttttaagTGCcctgccctctgatcc               |
| <i>MtTfuA_R201A_f</i> | gaccttaaaGCAaggagcgcactggag               |
| <i>MtTfuA_R201A_r</i> | tgcgctctcTGCTttaaggccctgcc                |
| <i>MtYcaO_C12A_f</i>  | ggtacattggaGCCaccacagggccgtgaggcc         |
| <i>MtYcaO_C12A_r</i>  | gcctgtgggtGGCtccaatgtacctgacaggaatatcccg  |
| <i>MtYcaO_C107A_f</i> | agccagaggacGCTgacggccttgaccctgagtcactg    |
| <i>MtYcaO_C107A_r</i> | tcaaggccgtcAGCgtcctctggctgtgctgtgaatgtttc |
| <i>MtYcaO_C158A_f</i> | ctccggaaggcGCCatgagctgttccgatcaaacc       |
| <i>MtYcaO_C158A_r</i> | aacagactcatGGCgccttccggagggttgatgg        |
| <i>MtYcaO_C207A_f</i> | tggagggtgacGCCtcaggagcggataatgatataatc    |
| <i>MtYcaO_C207A_r</i> | tccgtccctgaGGCgtcaacctccactttgggac        |
| <i>MtYcaO_E185A_f</i> | acgggctgatgGCGgtgattgaaagggatgcctggagc    |
| <i>MtYcaO_E185A_r</i> | ctttcaatcacCGCcatcagcccgtggaatatggcc      |

**Supplementary Table 2. Data collection, phasing and refinement statistics**

|                                                  | SeMet                                         | Native                    |
|--------------------------------------------------|-----------------------------------------------|---------------------------|
| <b>Data collection</b>                           |                                               |                           |
| Space group                                      | P2 <sub>1</sub> 2 <sub>1</sub> 2 <sub>1</sub> | C2                        |
| Unit cell dimensions (Å/°)                       | 46.3, 77.8, 129.9                             | 103.5, 36.8, 59.6 / 121.7 |
| Resolution (Å)                                   | 50.0 - 1.70 (1.73 - 1.70)                     | 50.9 - 1.65 (1.66 - 1.65) |
| Total reflections                                | 433,274                                       | 172,632                   |
| Unique reflections                               | 48,427                                        | 23,292                    |
| $R_{\text{sym}}$ (%) <sup>1</sup>                | 0.050 (0.740)                                 | 0.055 (0.868)             |
| $I/\sigma I$ <sup>1</sup>                        | 28.2 (2.0)                                    | 21.4 (2.2)                |
| Completeness (%) <sup>1</sup>                    | 98.7 (88.5)                                   | 99.8 (95.9)               |
| Redundancy                                       | 9.0 (7.1)                                     | 7.4 (7.4)                 |
| CC (1/2)                                         | 0.997 (0.839)                                 | 0.999 (0.787)             |
| Figure of merit                                  | 0.322                                         |                           |
| <b>Refinement</b>                                |                                               |                           |
| Resolution (Å)                                   |                                               | 25.0 - 1.65               |
| No. reflections                                  |                                               | 22,284                    |
| $R_{\text{work}} / R_{\text{free}}$ <sup>2</sup> |                                               | 16.8/19.5                 |
| <b>Number of atoms</b>                           |                                               |                           |
| Protein                                          |                                               | 1,681                     |
| Solvent                                          |                                               | 254                       |
| <b>B-factors</b>                                 |                                               |                           |
| Protein                                          |                                               | 23.3                      |
| Solvent                                          |                                               | 34.5                      |
| <b>Ramachandran statistics</b>                   |                                               |                           |
| Favored/Allowed                                  |                                               | 97.67/2.33                |
| Outliers                                         |                                               | 0                         |
| <b>R.m.s deviations</b>                          |                                               |                           |
| Bond lengths (Å)                                 |                                               | 0.746                     |
| Bond angles (°)                                  |                                               | 0.006                     |

1. Highest resolution shell is shown in parenthesis.

2. R-factor =  $\Sigma(|F_{\text{obs}}| - k|F_{\text{calc}}|) / \Sigma |F_{\text{obs}}|$  and R-free is the R value for a test set of reflections consisting of a random 5% of the diffraction data not used in refinement.

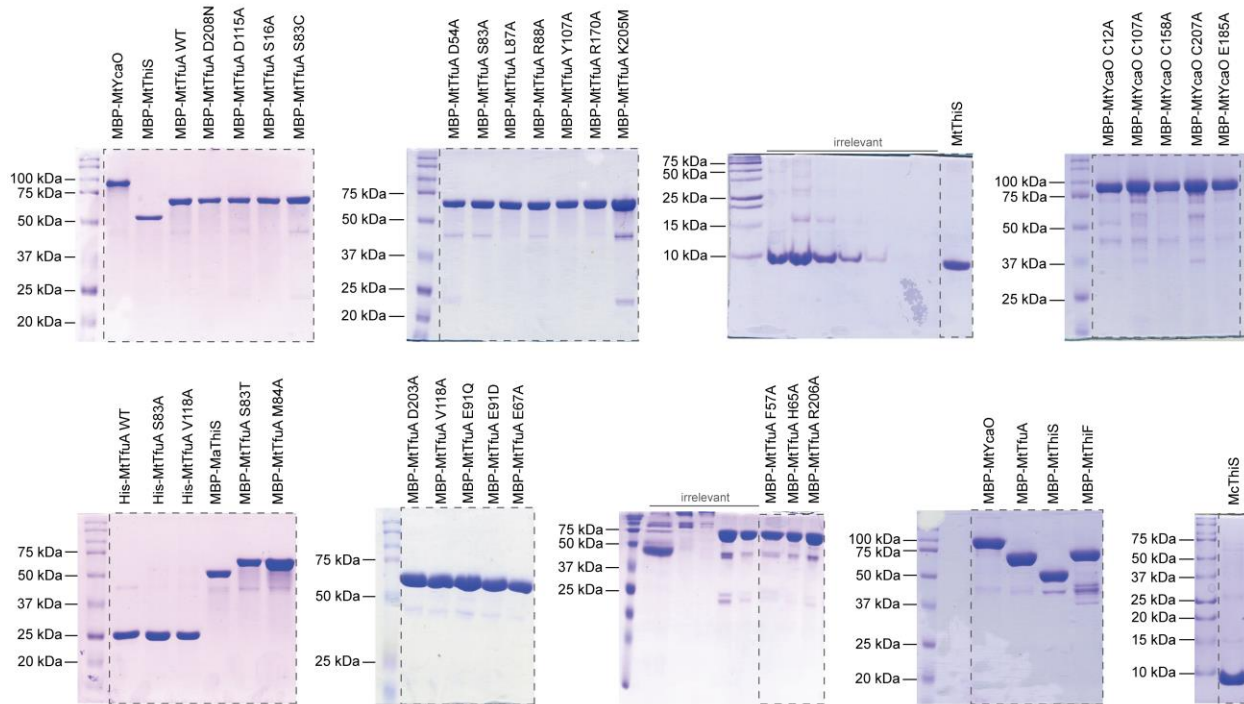

**Supplementary Figure 1. SDS-PAGE analysis of the proteins used in the study.** Protein purity was assessed visually using Coomassie staining. Abbreviations: Mt, *Methanothermobacter* sp. CaT2; Mc, *Methanothermococcus thermolithotrophicus*; Ma, *Methanosarcina acetivorans*; MBP, maltose-binding protein. Each protein was purified in at least two independent experiments and similar purity was observed. Boxed area denotes proteins used in this study.

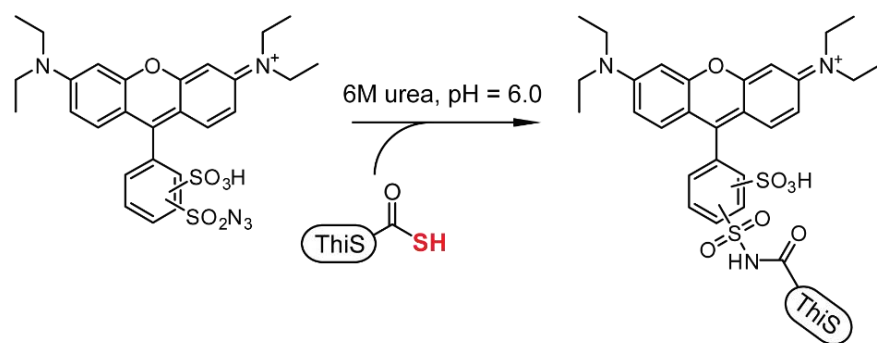

**Supplementary Figure 2. Reaction scheme of ThiS-COSH reacting with lissamine rhodamine sulfonyl azide (LRSA)<sup>1</sup>.** This reaction was used to quantify ThiS-COSH consumption during thioamidation reactions.

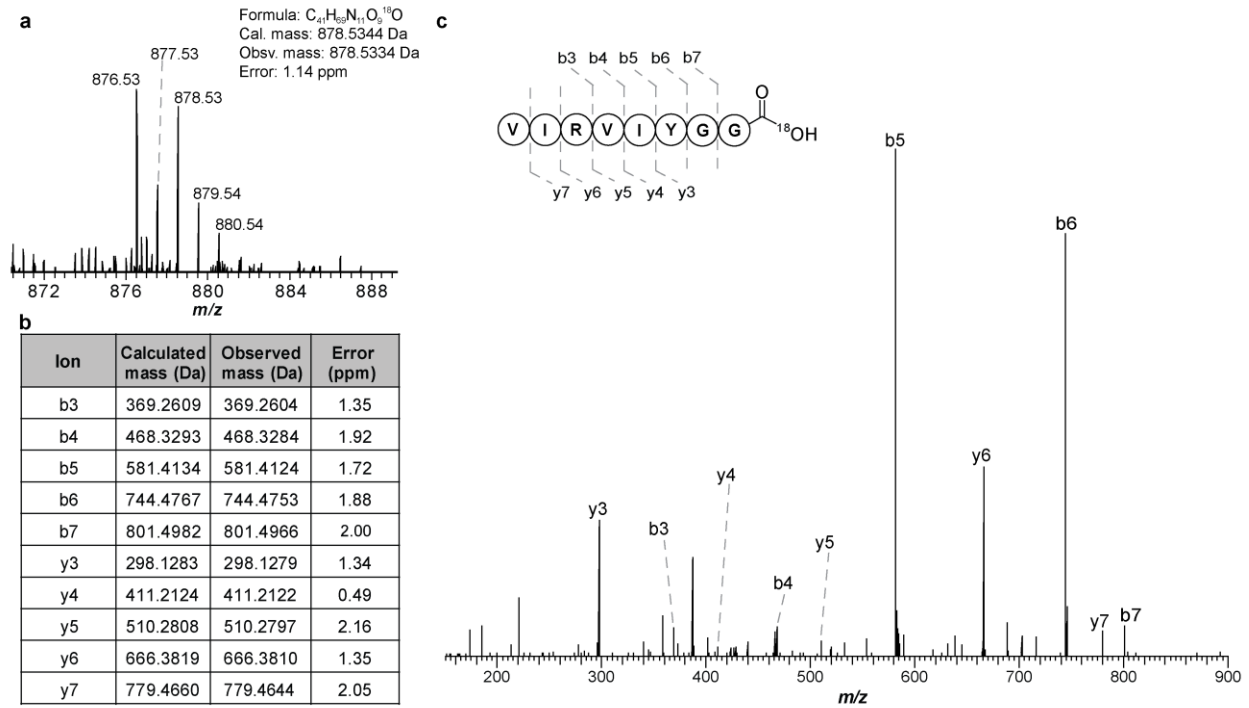

**Supplementary Figure 3. High-resolution and tandem MS of the *Mt*ThiS-COOH C-terminal fragment.** (a) The C-terminal GluC peptide fragment of *Mt*ThiS containing a [<sup>18</sup>O] label observed in HRMS. (b) *m/z* 878.53 was subjected to CID with assigned ions indicated in tabular form. (c) MS/MS spectrum showing the +2 Da mass change observed for all y-ions but not observed for any b-ion, localizing the mass increase to the C-terminus.

**a** *Mt*ThiS sgsMVIGMKFTVITDDGKKILESGAP---RRIKDLVGLGEL--EIPLETVVVKKNGE-----IVIEEEEIF-----DGDIEIVIRVIYGG  
*Ma*ThiS sgs-MAEVKVKLFLANLREAAGTPELPLSGEKVIDVLLSLTDKYPALKYVIFEKGDSEILILCGSINILINGNNIRHLEGLETLKDSDEIGILPPVSGG  
 : :\*...::: : . \* .: \*\*\* . \* : \* . \*: ::\*: \*:\*: ::\* \*:\* \* : : \*\*

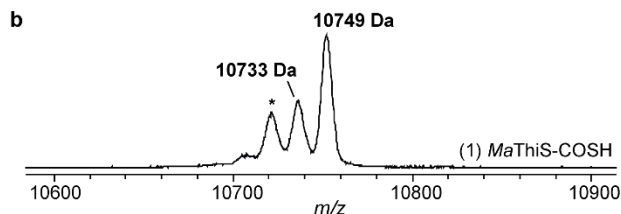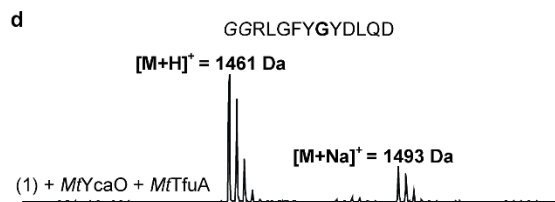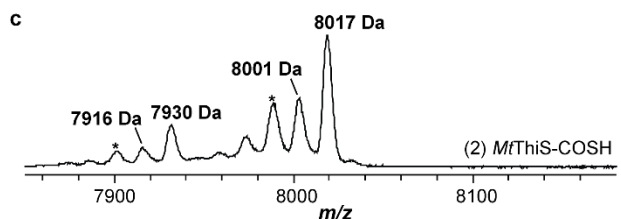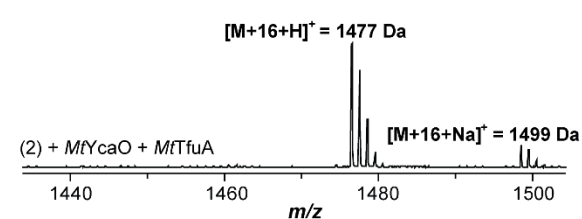

**Supplementary Figure 4. *Ma*ThiS-COSH is not a sulfur donor for thioamidation catalyzed by the *Mt* enzymes.** (a) Sequence alignment of *Mt*ThiS (WP\_048176273.1) and *Ma*ThiS (WP\_011023978.1). The N-terminal SGS is derived from the cloning vector. (b) MALDI-TOF mass spectrum of *Ma*ThiS-COSH ( $m/z$  10,749 Da) and *Ma*ThiS-COOH ( $m/z$  10,733 Da). (c) MALDI-TOF mass spectrum of *Mt*ThiS-COSH ( $m/z$  8,017 Da).  $m/z$  7,930 represents *Mt*ThiS-COSH with the N-terminal Ser (from cloning) proteolytically removed. Asterisks indicate laser-induced deamination. (d) *Top*, MALDI-TOF mass spectrum of the McrA peptide after reaction with *Mt*YcaO, *Mt*TfuA, and non-cognate *Ma*ThiS-COSH, yielding essentially no product. *Bottom*, an identical reaction using cognate *Mt*ThiS-COSH, yielding fully thioamidated McrA peptide.



**a** *Mt*ThiS sgsMVIGMKFTVITDDGKKILESGAPRRIKDVLGELEIPIETVVVKKNG**E**IVIE**E**EEEIFDGDIIIEVIRVIYGG  
*Mc*ThiS sgsMVIGMKFTVITDDGKKILESGAPRRIKDVLGELEIPIETVVVKKNG**Q**IVID**E**EEEIFDGDIIIEVIRVIYGG

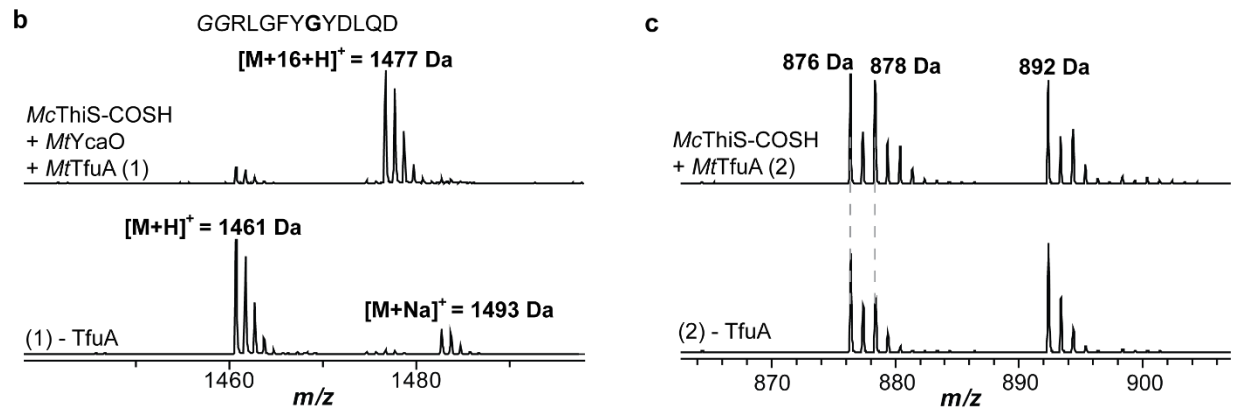

**Supplementary Figure 5. *Mc*ThiS-COSH as the substrate for *Mt*TfuA-catalyzed hydrolysis and thioamidation.** (a) Sequence alignment of *Mt*ThiS (WP\_048176273.1) and *Mc*ThiS (AAB86213.1) with the two non-identical residues in bold. The N-terminal SGS is derived from the cloning vector. (b) *Top*, MALDI-TOF mass spectrum of the *McrA* peptide reacted with *Mt*YcaO, *Mt*TfuA, and *Mc*ThiS-COSH showing the thioamidated product ( $m/z$  1,477 Da). *Bottom*, control with TfuA omitted. (c) *Top*, MALDI-TOF mass spectrum of the C-terminal GluC peptide fragment of *Mc*ThiS-COSH ( $m/z$  892 Da). Upon treatment with TfuA in [<sup>18</sup>O]-H<sub>2</sub>O, *Mc*ThiS-COSH undergoes hydrolysis to *Mc*ThiS-COOH with incorporation of [<sup>18</sup>O] ( $m/z$  878 Da). *Bottom*, control with TfuA omitted.

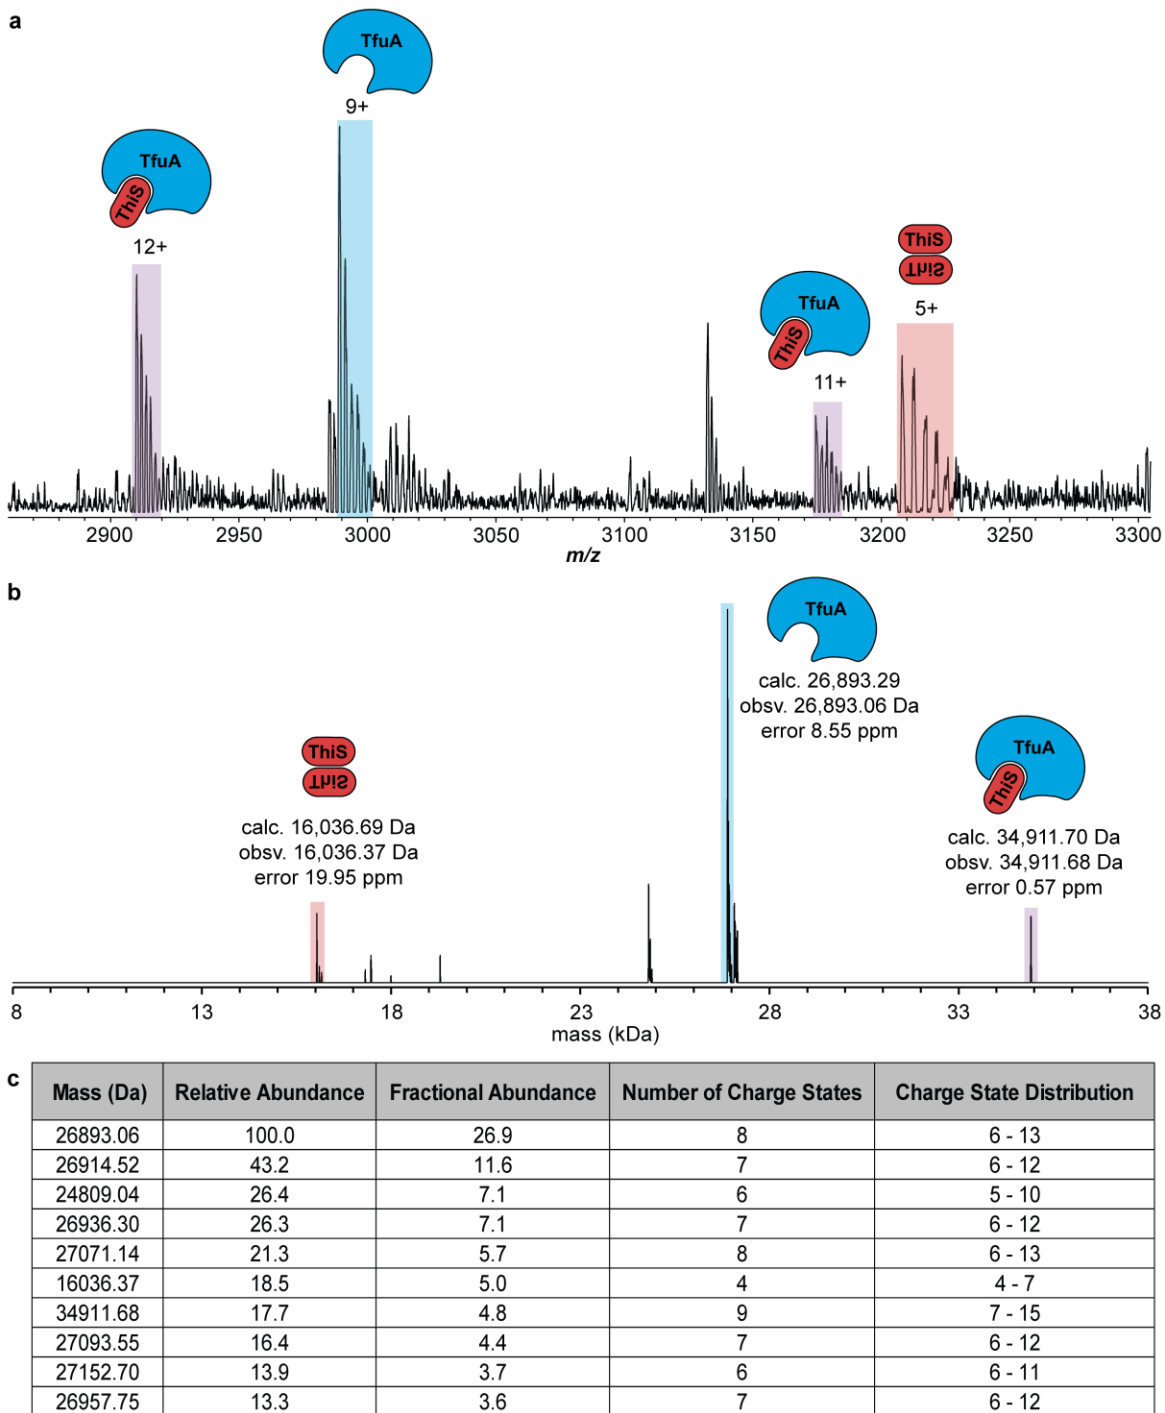

**Supplementary Figure 6. Native mass spectra of *MtTfuA* and *MtThiS-COSH*.** (a) The native mass spectrum acquired using a ThermoFisher Q Exactive Ultra High Mass Range (UHMR) mass spectrometer showing the *MtTfuA* monomer (blue), homodimeric *MtThiS-COSH* (red), and *MtTfuA*:*MtThiS-COSH* heterodimer (purple) at various charge states. (b) Deconvoluted mass spectrum from data in panel a using BioPharma Finder v3.1. The experimental and calculated masses for *MtTfuA* (His-tagged and N-terminal Met removed), *MtThiS-COSH* homodimer, and *MtTfuA*:*MtThiS-COSH* heterodimer are indicated. (c) Mass table of the top ten species by relative abundance.

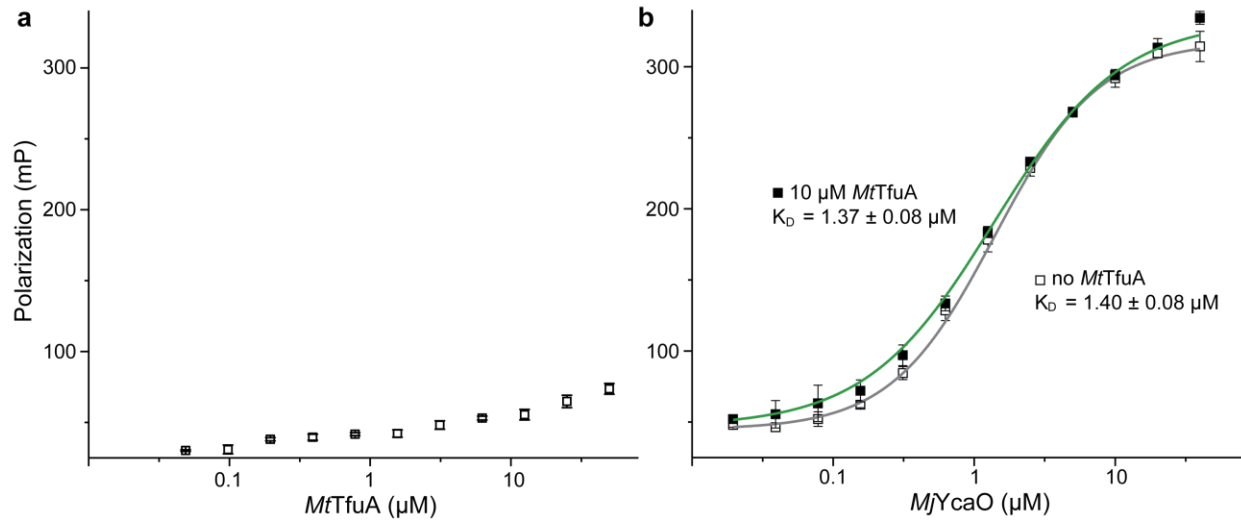

**Supplementary Figure 7. *MtTfuA* does not bind the McrA peptide or change its binding to *MjYcaO*.**

(a) Fluorescence polarization (FP) titration of Tfua with FITC-labeled McrA peptide (GG-RLGFYGYDLQD). No significant polarization was observed. Polarization values are reported as mean values  $\pm$  SD ( $n = 3$  independent experiments). (b) FP titration of the same peptide with *MjYcaO* in the presence (filled squares) and absence (open squares) of *MtTfuA*. Polarization values are reported as mean values  $\pm$  SD ( $n = 3$  independent experiments) and analyzed through non-linear regression (dose-response model). The resultant estimates for  $K_D \pm$  SE are reported.

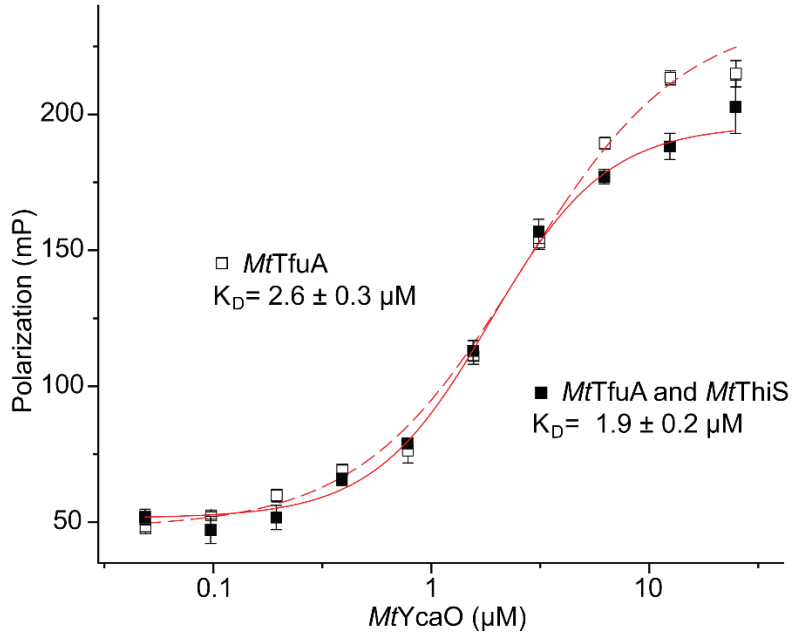

**Supplementary Figure 8. *MtThiS* does not alter the *MtYcaO*-McrA peptide binding.** Fluorescence polarization (FP) titration of *MtYcaO* with FITC-labeled McrA peptide (GG-RLGFYGYDLQD) in the presence of *MtTfuA* (10  $\mu\text{M}$ , open squares) or *MtTfuA* and *MtThiS* (10  $\mu\text{M}$  each, filled squares). Polarization values are reported as mean values  $\pm$  SD ( $n = 3$  independent experiments) and analyzed through non-linear regression (dose-response model). The resultant estimates for  $K_D \pm$  SE are reported.

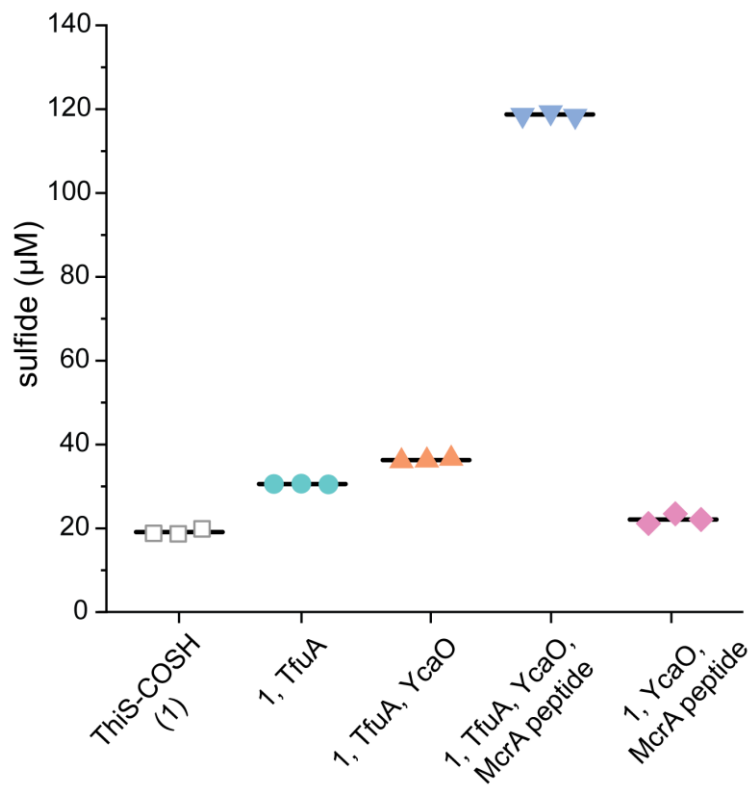

**Supplementary Figure 9. Quantification of sulfide released from ThiS-COSH hydrolysis.** Fluorescence quantification of sulfide production as a result of *Mt*ThiS-COSH (150 μM) hydrolysis after a 2 h reaction in the presence of different components (10 μM *Mt*TfuA, *Mt*YcaO, and 50 μM McrA peptide). ATP was omitted to prevent thioamidation of the peptide substrate. Individual data points ( $n = 3$  independent experiments) and the mean values (lines) are presented.





Patatin  
(PF01734)

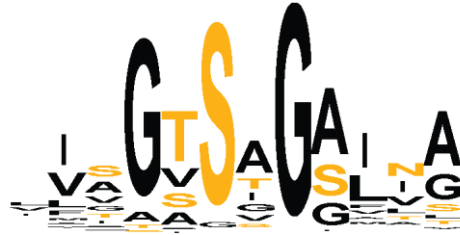

TfuA  
(PF07812)

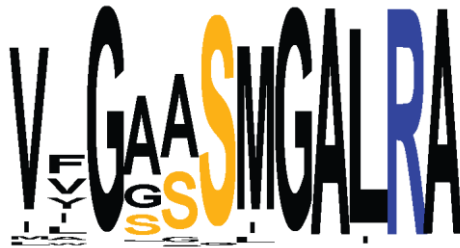

**Supplementary Figure 12. Sequence logos of TfuA and patatin active sites.** Sequence logos were generated for the Patatin and the TfuA protein families using WebLogo<sup>3</sup>. The Gly-(Xaa)<sub>1-2</sub>-Ser-Xaa-Gly motifs from both families contain the active site Ser and are aligned in the HHpred analysis of TfuA<sup>4</sup>. Basic and uncharged polar residues are colored blue and orange, respectively.



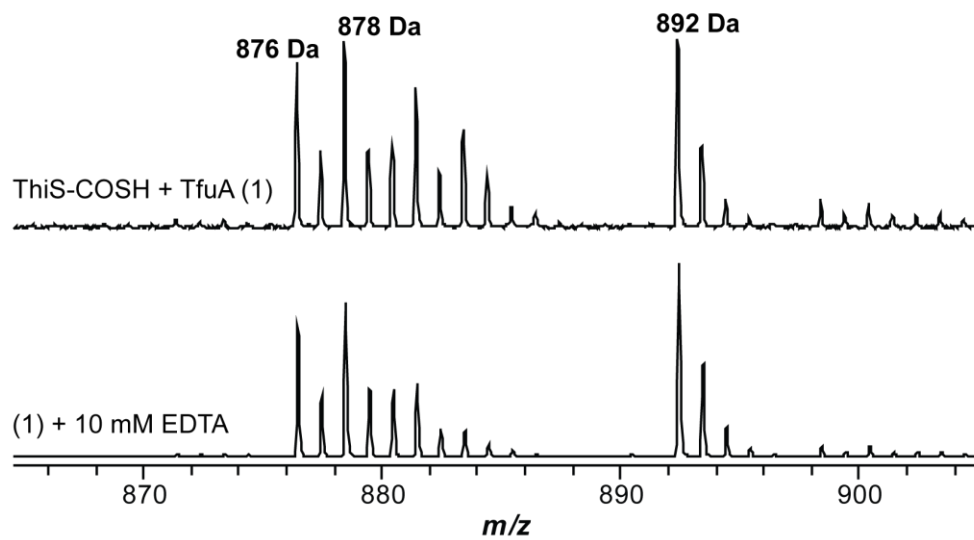

**Supplementary Figure 13. *Mt*TfuA-catalyzed *Mt*ThiS-COSH hydrolysis is unaffected by EDTA.** *Top*, MALDI-TOF mass spectrum of the C-terminal GluC peptide fragment of *Mt*ThiS-COSH ( $m/z$  892 Da). Upon treatment with *Mt*TfuA in [ $^{18}\text{O}$ ]- $\text{H}_2\text{O}$ , *Mt*ThiS-COSH undergoes hydrolysis to *Mt*ThiS-COOH with incorporation of [ $^{18}\text{O}$ ] ( $m/z$  878 Da). *Bottom*, identical experiment with 10 mM EDTA added.

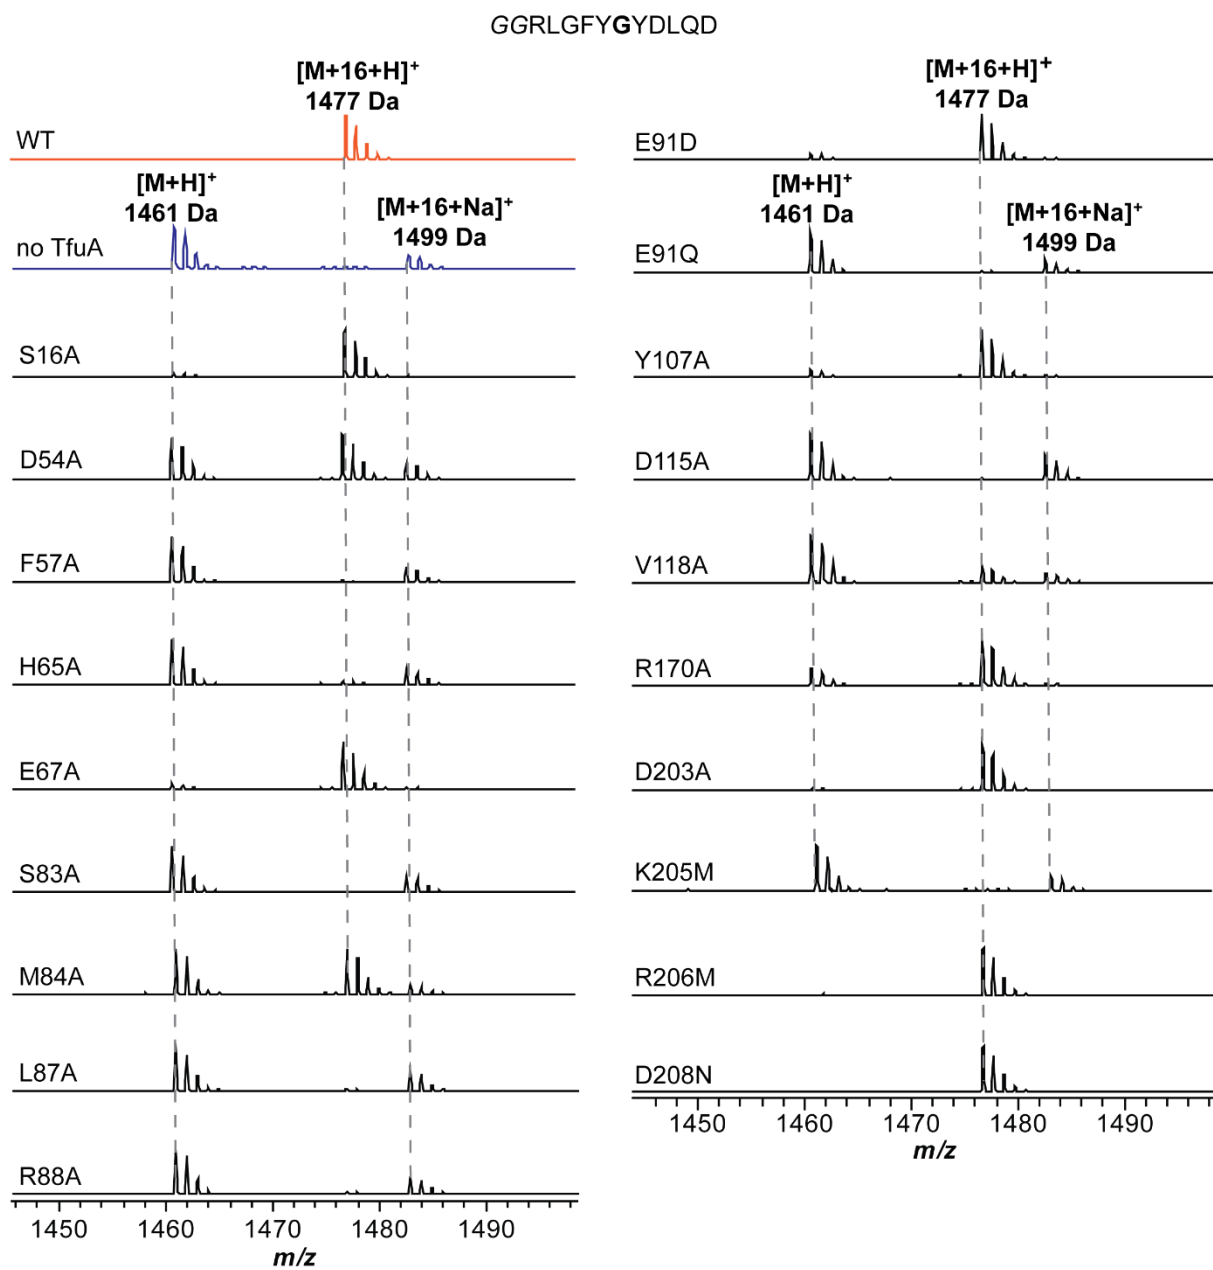

**Supplementary Figure 14. MALDI-TOF-MS analysis of McrA peptide thioamidation using *MtTfuA* variants.** MALDI-TOF mass spectra of the McrA peptide (40  $\mu$ M) after reaction with *MtYcaO* (2  $\mu$ M), *MtThiS-COSH* (50  $\mu$ M), and *MtTfuA* (2  $\mu$ M) variants under identical conditions for 1 h.

C-terminal GluC fragment: VIRVIYGG

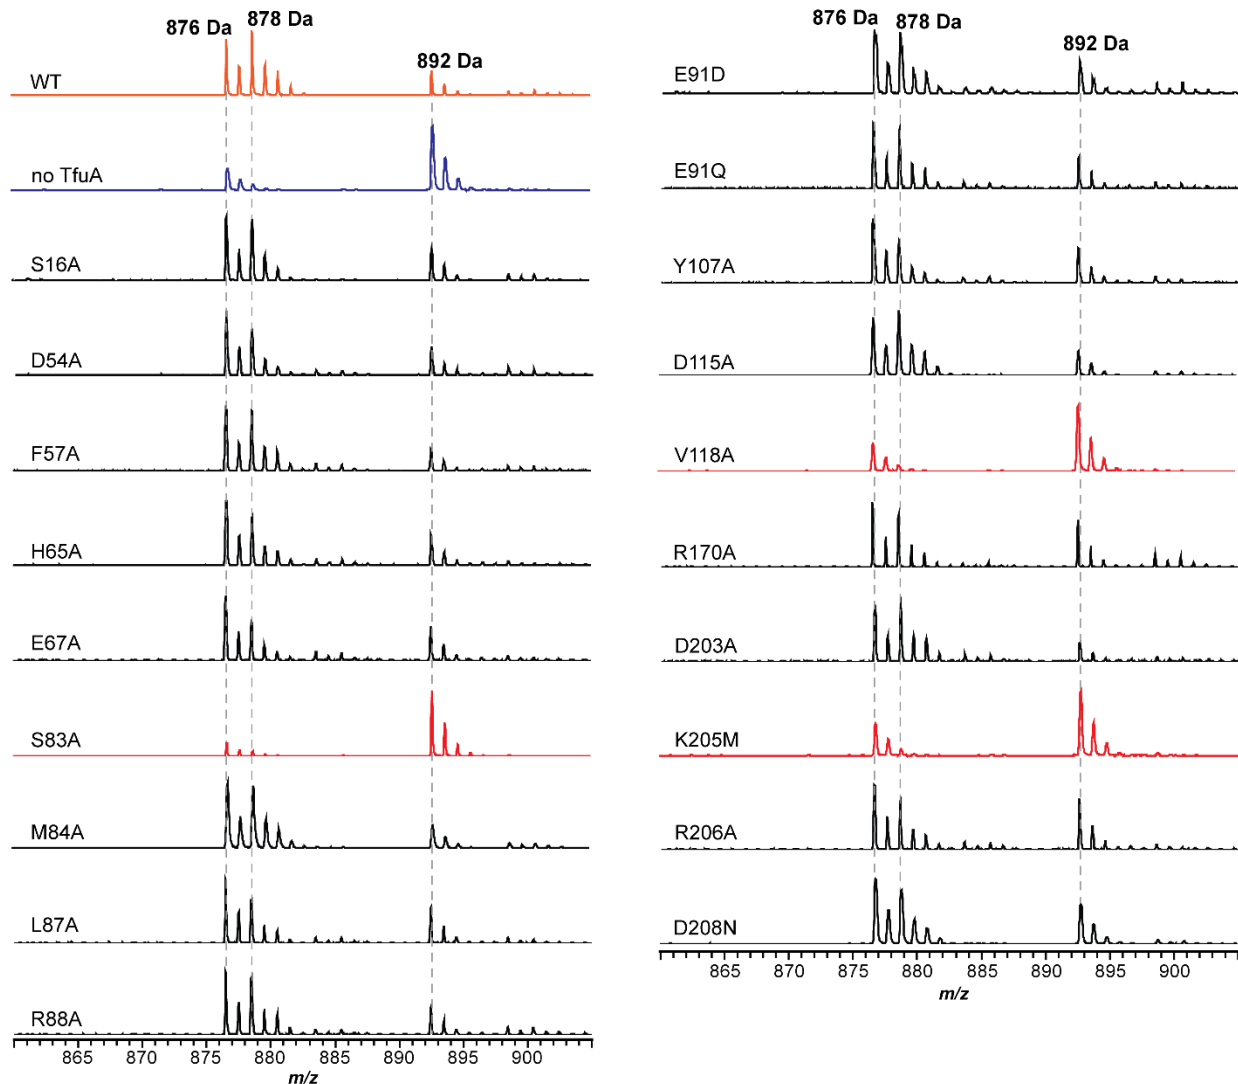

**Supplementary Figure 15. MALDI-TOF-MS analysis of *MtThiS*-COSH hydrolysis using *MtTfuA* variants.** MALDI-TOF mass spectra of the C-terminal GluC peptide fragment of *MtThiS* (45  $\mu$ M, carboxylate,  $m/z$  876 Da; [ $^{18}$ O]-carboxylate,  $m/z$  878 Da; thiocarboxylate,  $m/z$  892 Da) after reaction with *MtTfuA* variants (5  $\mu$ M) under identical conditions. Control reactions with wild-type *MtTfuA* (orange, 5  $\mu$ M) and no TfuA (blue) are highlighted. Three *MtTfuA* variants gave background-levels of *MtThiS*-COSH hydrolysis (S83A, V118A, and K205M, red).

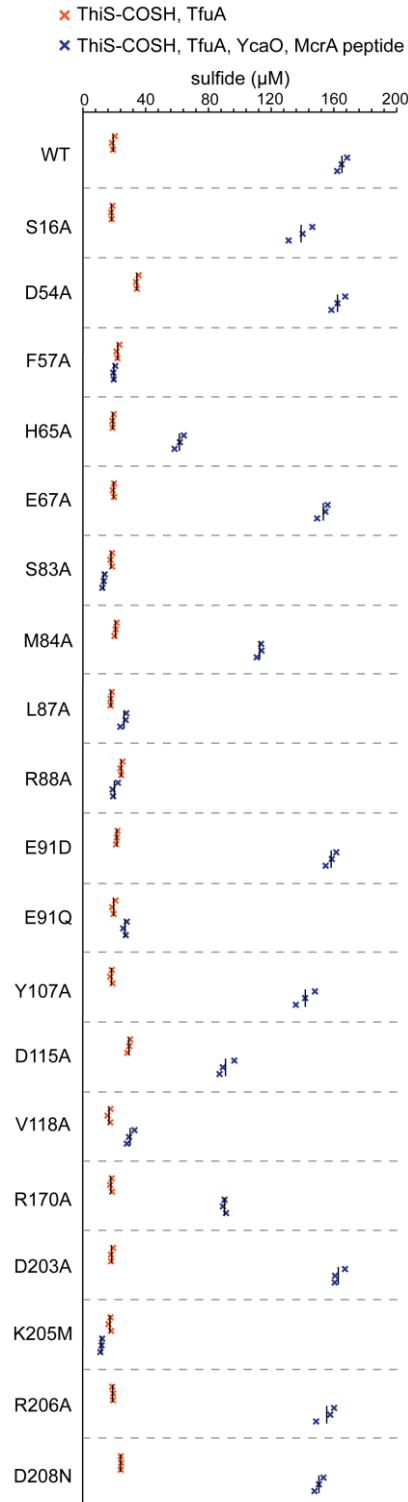

**Supplementary Figure 16. Sulfide release from *Mt*ThiS-COSH hydrolysis using *Mt*TfuA variants.** Endpoint fluorescence quantification of sulfide produced from *Mt*ThiS-COSH (150  $\mu\text{M}$ ) hydrolysis upon reaction with the *Mt*TfuA variant alone (10  $\mu\text{M}$ ), and *Mt*TfuA variant (10  $\mu\text{M}$ ), *Mt*YcaO (10  $\mu\text{M}$ ), and McrA peptide (50  $\mu\text{M}$ ). ATP was absent in all reactions. Individual data points ( $n = 3$  independent experiments) and the mean values (lines) are presented.

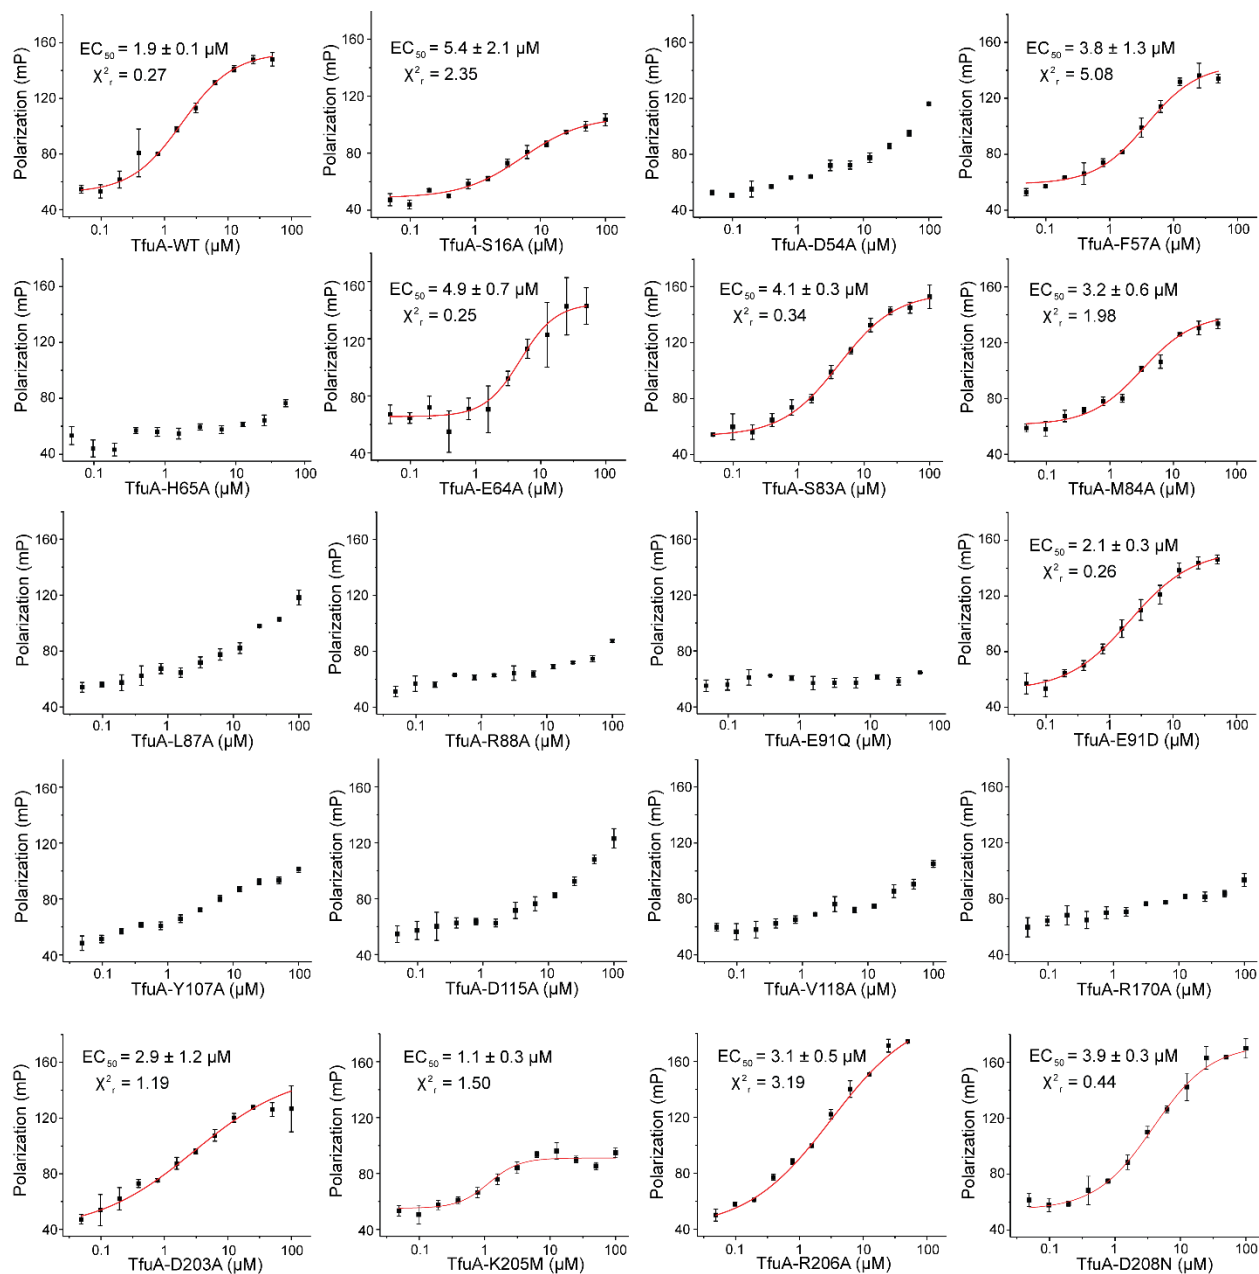

**Supplementary Figure 17. Fluorescence polarization analysis of *MtTfuA* variants.** FP titrations of *MtTfuA* variants using FITC-labeled McrA peptide (*GG-RLGFYGYDLQD*) and 1.5  $\mu\text{M}$  *MtYcaO*. Polarization values are presented as the mean values  $\pm$  SD ( $n = 3$  independent experiments) and fitted into a dose-response model via non-linear regression analysis. The resultant estimates for  $\text{EC}_{50} \pm \text{SE}$  and reduced chi-square values are reported.

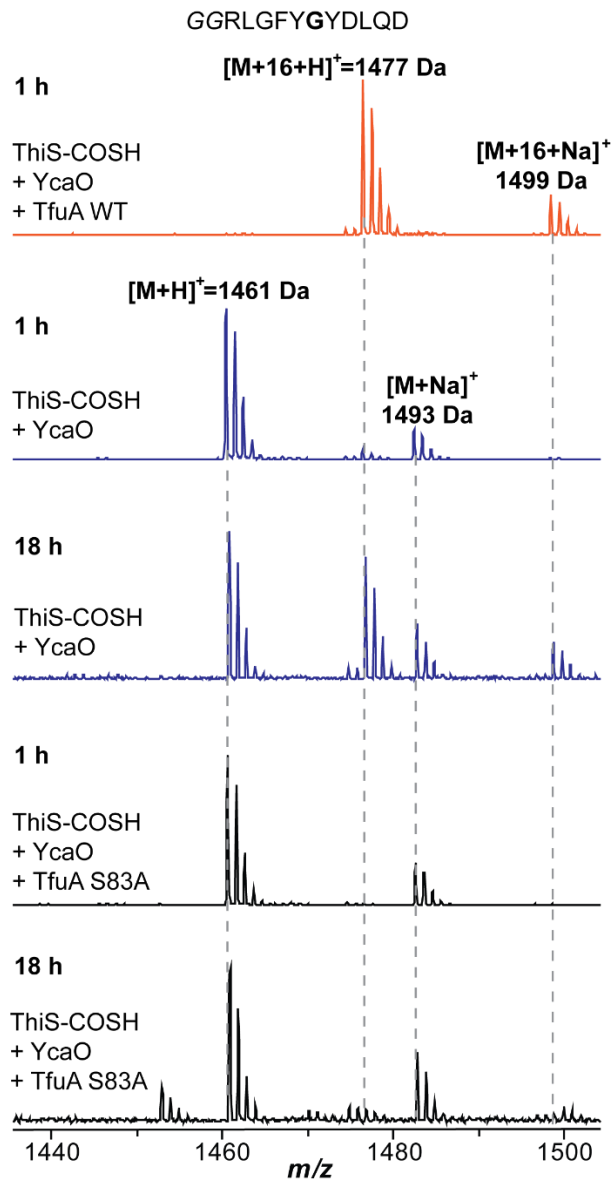

**Supplementary Figure 18. MALDI-TOF-MS analysis of reactions using *Mt*TfuA-S83A variant.** *Top*, MALDI-TOF mass spectrum of the McrA peptide after reaction with *Mt*YcaO, *Mt*TfuA, and *Mt*ThiS-COSH showing thioamidated product ( $m/z$  1,477 Da). Identical reactions with TfuA omitted (blue) or substituted by TfuA-S83A (black) at 1 h and 18 h are shown. Reactions containing all components were completed within 1 h, whereas reactions lacking TfuA remained incomplete even after 18 h. Reactions containing the TfuA-S83A were severely inhibited, likely from binding to ThiS-COSH and hindering hydrolysis.

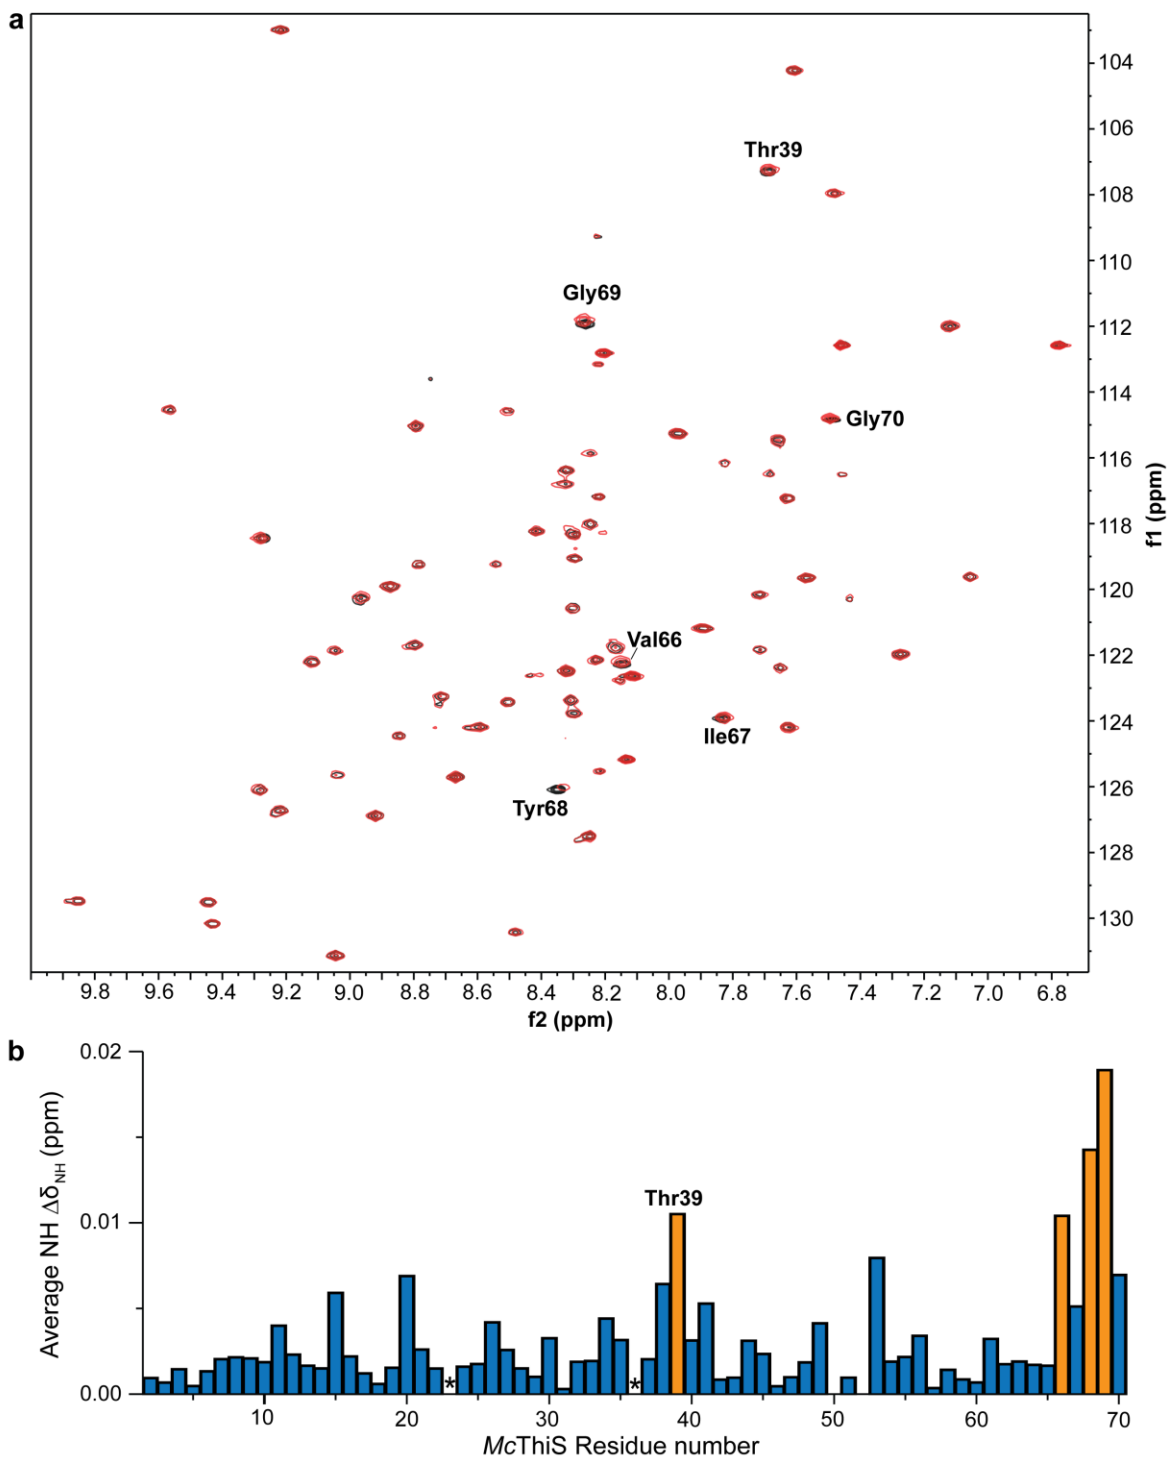

**Supplementary Figure 19. *McThiS*  $^1\text{H}$ ,  $^{15}\text{N}$ -HMQC spectra upon *MtTfuA-S83A* variant titration. (a)** An overlay of *McThiS*  $^1\text{H}$ ,  $^{15}\text{N}$ -HMQC spectra in the presence (red) and absence (black) of *MtTfuA-S83A* (2 equiv.). Residues with significant chemical shift perturbations are labeled. **(b)** Chemical shift perturbation for each residue. Residues with the largest chemical shift perturbation upon titration with *MtTfuA-S83A* are highlighted in orange. Asterisks, Pro residues. *MtTfuA-S83A* binds to *McThiS* in a manner similar to wild type *MtTfuA*.

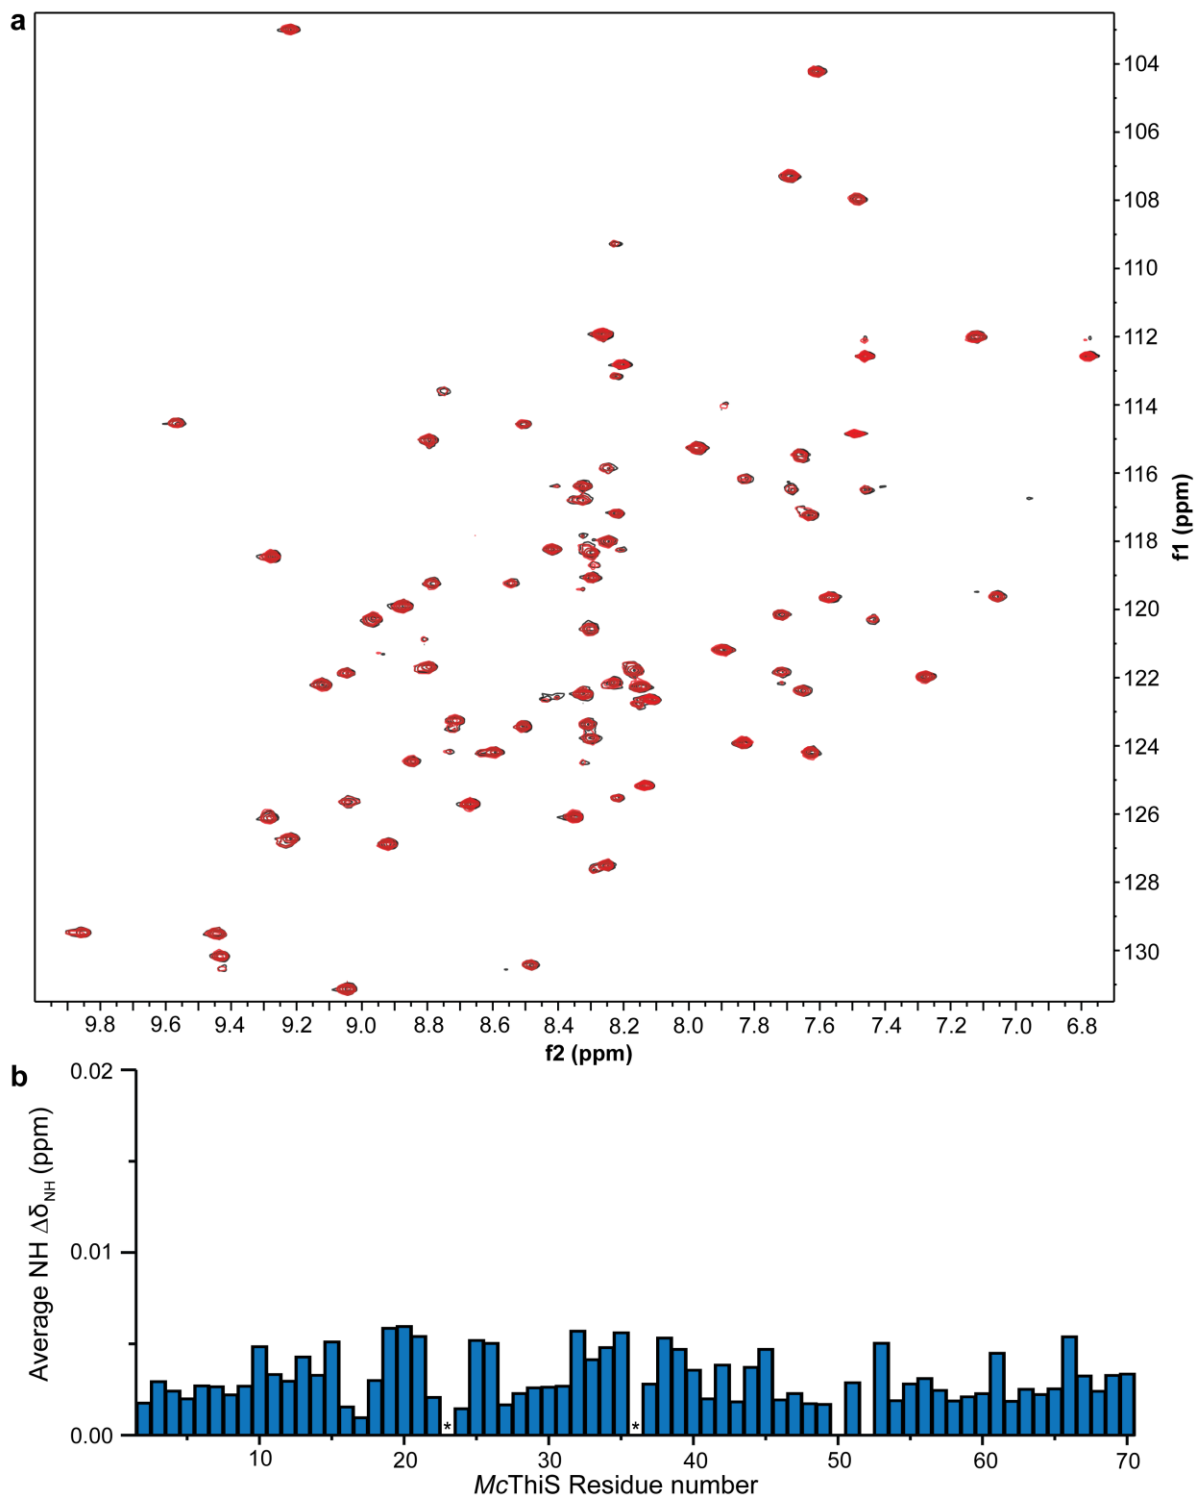

**Supplementary Figure 20. *McThiS*  $^1\text{H}$ ,  $^{15}\text{N}$ -HMQC spectra upon *MtTfuA*-V118A variant titration. (a) An overlay of *McThiS*  $^1\text{H}$ ,  $^{15}\text{N}$ -HMQC spectra in the presence (red) and absence (black) of *MtTfuA*-V118A (6 equiv.). (b) Chemical shift perturbation for each residue. Asterisks, Pro residues. *MtTfuA*-V118A does not bind to ThiS in a wild type-like manner.**



|                                    |                                                                  |     |
|------------------------------------|------------------------------------------------------------------|-----|
| <i>M. maripaludis</i>              | -----MEDDINYTLAAYRICTPEETFEKIEPIIKEIGVTRTARIDGLDRIGIPVFSSIRP     | 55  |
| <i>M. palustris</i>                | --MELSSCRKGYRNETQRAVDPAITLERIERLLPTTGITRVADITGLDRIGIPVFSCMRP     | 58  |
| <i>Candidatus M. intestinalis</i>  | --MKLGHTPKKYTHGGHHAVDPETTLKRIEPLAEVAGITRTADITDLDRIGIPVFSSIRP     | 58  |
| <i>M. acetivorans</i>              | MPEIKIDRSLSYLEGTQRVYDEATTLNTKDKQIKKIGVTRIADITNLDRLGIPIFSAIRP     | 60  |
| <i>Methanothermobacter sp. CaT</i> | ---MFRDIPVRYIGCTHRAVRPSETLKAFRDKLSMIGVTRITEITHLDRIGIPVFSAIRP     | 57  |
|                                    | * : *:: . *:* : * **:*:*:*:*:*:                                  |     |
| <i>M. maripaludis</i>              | SAKDGAISVYAGKGATEIQAKVSVSTMEAIERYSAEFDENS-----KLELIK             | 101 |
| <i>M. palustris</i>                | AAADGAISVYNGKATPIAARVSAIMEGIERYSAEVHDRP-----LITGTYDSL            | 108 |
| <i>Candidatus M. intestinalis</i>  | SAESGAISVYNGKGLTKDEAKVSSIMEGIERYSAEVHDRP-----VVRAGVEEFM          | 108 |
| <i>M. acetivorans</i>              | SAAPGAISVYSGKSTQRRARISAIMESIERYCLAERPGVNNANIEGGISAPALVESYSNAQ    | 120 |
| <i>Methanothermobacter sp. CaT</i> | TAE DGAVSIYAGKATRTQARASAMMEAFERYSAERKPE-----DETFTAQP             | 104 |
|                                    | : * **:*:* * ** * : * : **:*:* **                                |     |
| <i>M. maripaludis</i>              | EPENPINLDDLLILPGGKRAEYS DTDGIEWVSGTDIISGKTFDVPINS AVHPYDG---KK   | 157 |
| <i>M. palustris</i>                | RQGNVVDPRDLILPNDADP----DRVLSVWKGFDIVQHEEVLLPAHAVFHPPLPQ-GA-AP    | 162 |
| <i>Candidatus M. intestinalis</i>  | AANNAVHPMDLILPQGAAYTSL-RYQVGWVKGETELNSMSEMWPASAVFHPYSS-KLDM      | 166 |
| <i>M. acetivorans</i>              | ENCNVLDPNLSLLSQPFNP---GSLLEWVGAYDLMNREEVFNANAVHYPHYDAPGQCQK      | 176 |
| <i>Methanothermobacter sp. CaT</i> | EDCDGLDPESLILPGSADL----KSELEWINAENLTGDEEVPVPANAVFHPYNPPEGCMS     | 160 |
|                                    | : . . *:* : * : . : . : . : . : . *                              |     |
| <i>M. maripaludis</i>              | LFRSNTNGLASGNSEEEAIFHGMLEVIERDAWSISELSKNTYRKVNVENAKNPLIFELK      | 217 |
| <i>M. palustris</i>                | LFRTSTNGIASGNTLEEATFHALAEI IERDAWSIAEVLHDTGPVITDV--TDPTACSLLD    | 220 |
| <i>Candidatus M. intestinalis</i>  | LFRTSTNGLASGNTLEEAILHGLLEVVVERDSWSFTEYYRRVNGDIEIP--GSGPVKDLVD    | 224 |
| <i>M. acetivorans</i>              | LFLSNTNGLASGNVLEEAILHGLLEVIERDAISTAQFTRNLGKEIVLT-EEDGYLYELAR     | 235 |
| <i>Methanothermobacter sp. CaT</i> | LFRSNTNGLASGNAREEAIFHGLMEVIERDAWSLFEARRGPKVEVDCSGTDNDIISGLLE     | 220 |
|                                    | ** : . **:*:* ** * : . : *:*:*:* : * : : : . *                   |     |
| <i>M. maripaludis</i>              | KFEKAKINIILKDLTSEVGIPVAAISDDVVKDPALLCMGVGCHLHPEIAVLRALTEVA       | 277 |
| <i>M. palustris</i>                | AFSTAGVDIVLHDLTSDIGIPTIAAASDDPVLDRPRLTLGMGHTTSAIATLRALTEVA       | 280 |
| <i>Candidatus M. intestinalis</i>  | KFTAKGIEVHLKDLTSDIGIPTIAAATDDVEMQDPALLTLGIGTHLDPELA AVKALLEVA    | 284 |
| <i>M. acetivorans</i>              | KFKDTGIDLKIWLVPDGTGIPTIIAATDDVVKDPALLVMGAGSHLKPEIATARAITEAA      | 295 |
| <i>Methanothermobacter sp. CaT</i> | KFHAAGVEVTLVLDLTADTG VATVA AVADDTVLKDPALLTMGVGTHLDP EIAVIRALTEVA | 280 |
|                                    | * : : : : : : * : * : * : ** : : ** * * : * * * : * : * : *      |     |
| <i>M. maripaludis</i>              | QSRATQIHGAREDTNRGDVVRISYDRMKRVHKKWYTFKN-EINIEDMPDNAKLNKKDI       | 336 |
| <i>M. palustris</i>                | QSRVTQIHGAREDTTEADERRSIGYDRVKRLNRYWYEGKS-TVPYAALTSCDTEDFLDDI     | 339 |
| <i>Candidatus M. intestinalis</i>  | QSRLTQIHGAREDTV RGEAARKLGYERMRRINKMWLEDSENSISLDSFPDQVTDIFDDL     | 344 |
| <i>M. acetivorans</i>              | QSRVVQIQGAREDTDREGFIRSVGYDRMKRLNWFVFEEGE-KISLSEVKDLSGKSPTENI     | 354 |
| <i>Methanothermobacter sp. CaT</i> | QSRATQIHGTREDTVRAEFMR RAGYERMKRLNRHWFSEPEDTITLDDMEDLSTRSFMGDL    | 340 |
|                                    | ** * . **:*:* ** * . * : *:*:*:* : * . : . : . : . : :           |     |
| <i>M. maripaludis</i>              | ETVKHILKQNGFDKIITVKLNKTD--IDVSRV IIPKMEMYSVDRDRISLWIKDRIRRNLE    | 394 |
| <i>M. palustris</i>                | RVVTDRLAAVGLDRVIVSDLTRPETGVNVVRVVPGLETYAMDNERGERCRHARHRLS        | 399 |
| <i>Candidatus M. intestinalis</i>  | QITRARLNAKGLNRTIIVDLTREEIGISVVKVIVPGMEVFAIDDERVGLRMMNGR-----     | 399 |
| <i>M. acetivorans</i>              | DIILEQLKGLTEKV-IVVDLSREEI AVPVVRV IIPGFELFTIDRDRKQRI TAGKKKEFT   | 413 |
| <i>Methanothermobacter sp. CaT</i> | EITLRKLHEAGLKD-VFYVDL TRDVGVPVVRVIVPGLEVFSVDPERVGRIRSSI-----     | 394 |
|                                    | * . : : : * : * : * : * : * : * : *                              |     |
| <i>M. maripaludis</i>              | SNLNLI----- 400                                                  |     |
| <i>M. palustris</i>                | RTES----- 403                                                    |     |
| <i>Candidatus M. intestinalis</i>  | ----- 399                                                        |     |
| <i>M. acetivorans</i>              | RDQNDKPKWRR 424                                                  |     |
| <i>Methanothermobacter sp. CaT</i> | ----- 394                                                        |     |

**Supplementary Figure 21. Sequence alignment of representative TfuA-dependent methanogenic YcaO proteins.** YcaO protein sequences from *Methanothermobacter sp. CaT2* (WP\_048175616.1), *M. maripaludis* (AVB77164.1), *Candidatus M. intestinalis* (WP\_020449401.1), *M. palustris* (ACL16549.1), *M. acetivorans* (WP\_011020223.1) are aligned with Clustal Omega<sup>2</sup>. Residues highlighted in red were substituted in the current study.

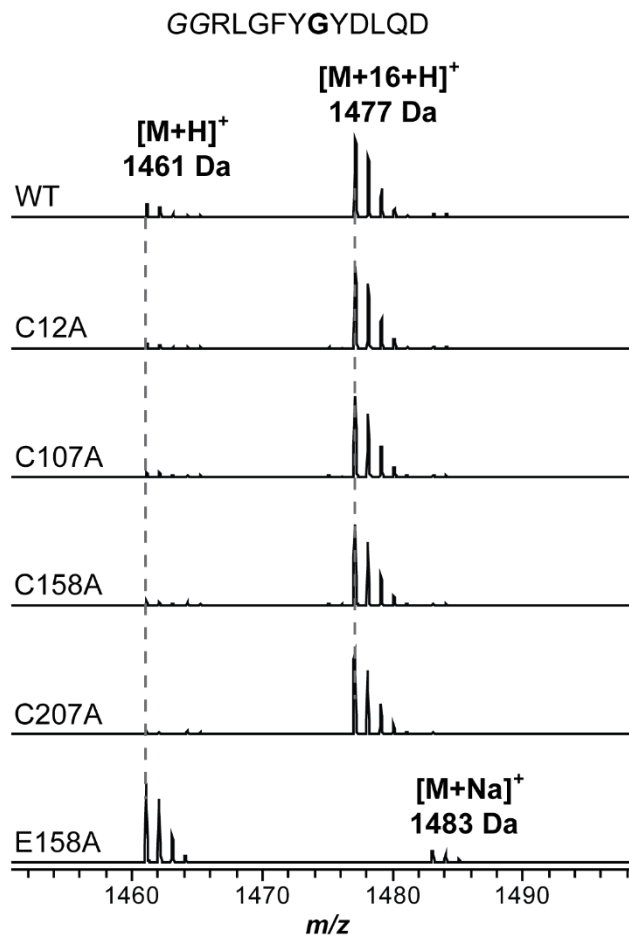

**Supplementary Figure 22. MALDI-TOF-MS analysis of McrA peptide thioamidation using *MtYcaO* variants.** MALDI-TOF mass spectra of the McrA peptide after reaction with *MtTfuA*, *MtThiS-COSH*, and *MtYcaO* variants under identical conditions for 1 h. *MtYcaO* Cys variants showed wild-type-like activity. As a control, the presumed ATP-binding deficient *MtYcaO* variant (E158A) exhibited abolished activity.

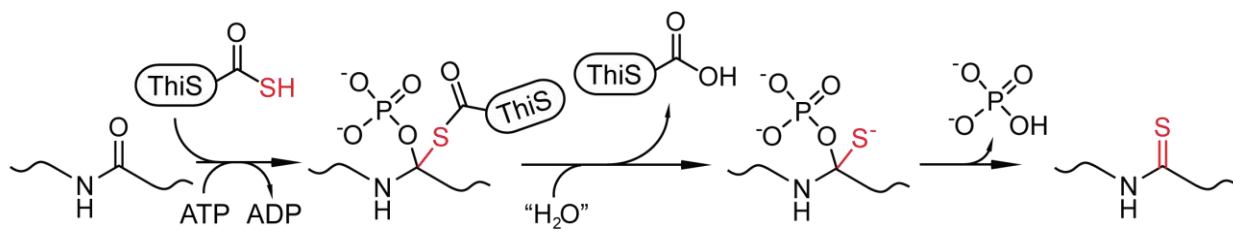

**Supplementary Figure 23. Alternative sulfur transfer mechanism.** ThiS-COSH attacks activated McrA peptide to form a thioester-hemiorthoamide intermediate. Subsequent hydrolysis aided by TfuA leads to the formation of thioamide and release of ThiS-COOH.

## References

1. Krishnamoorthy, K. & Begley, T. P. Reagent for the Detection of Protein Thiocarboxylates in the Bacterial Proteome: Lissamine Rhodamine B Sulfonyl Azide. *J. Am. Chem. Soc.* **132**, 11608–11612 (2010).
2. F, M. *et al.* The EMBL-EBI search and sequence analysis tools APIs in 2019. *Nucleic Acids Res.* **47**, W636–W641 (2019).
3. Crooks, G. E. WebLogo: A Sequence Logo Generator. *Genome Res.* **14**, 1188–1190 (2004).
4. Zimmermann, L. *et al.* A Completely Reimplemented MPI Bioinformatics Toolkit with a New HHpred Server at its Core. *J. Mol. Biol.* **430**, 2237–2243 (2018).
